# Supplementary material
Source: MDPI journal article supplement (https://www.mdpi.com/2304-6740/11/5/188)
Supplement: s1 [file s1]

## Supplementary information

# Coupling Pyrazine to Dithiocarbonates for Molybdopterin Model Ligands—Indispensable Tin

Siva Sankar Murthy Bandaru <sup>1</sup>, Claudia Schindler <sup>1,2</sup>, Felix Wenzek <sup>1</sup> and Carola Schulzke <sup>1,\*</sup>

<sup>1</sup> Institut für Biochemie, Universität Greifswald, Felix-Hausdorff-Straße 4, 17489 Greifswald, Germany

<sup>2</sup> Cheplapharm Arzneimittel GmbH, Ziegelhof 24, 17489 Greifswald, Germany

\* Correspondence: carola.schulzke@uni-greifswald.de

### Contents

NMR spectra for the compounds **12**, **14**, **15**, **16** 1-5

Crystal Data and Structure Refinement for **12**, **13**, **14**, **16** 6-12

### NMR spectra

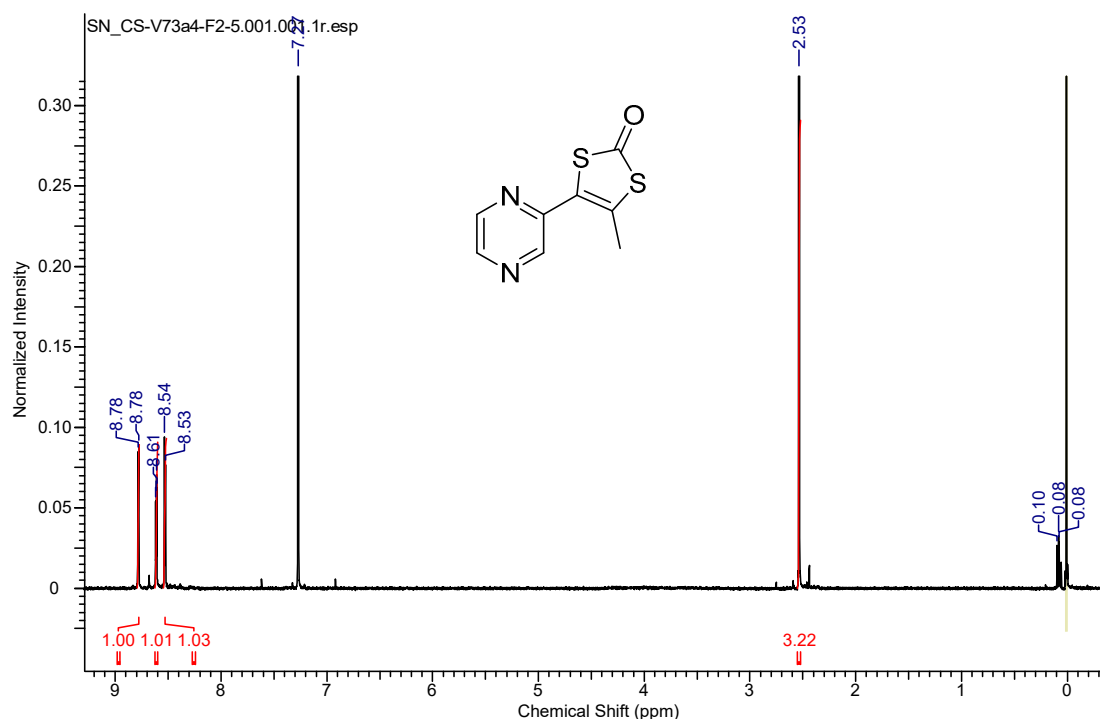

Figure S1: <sup>1</sup>H spectrum of compound **12**.

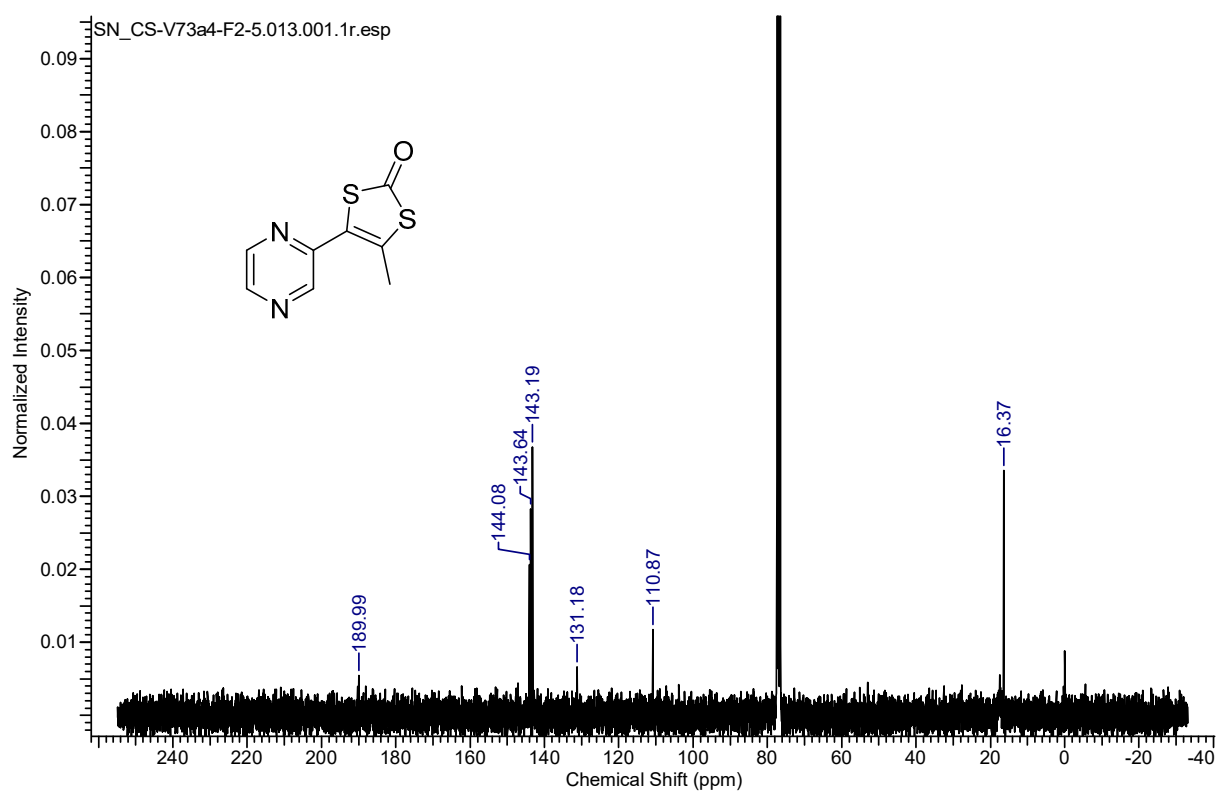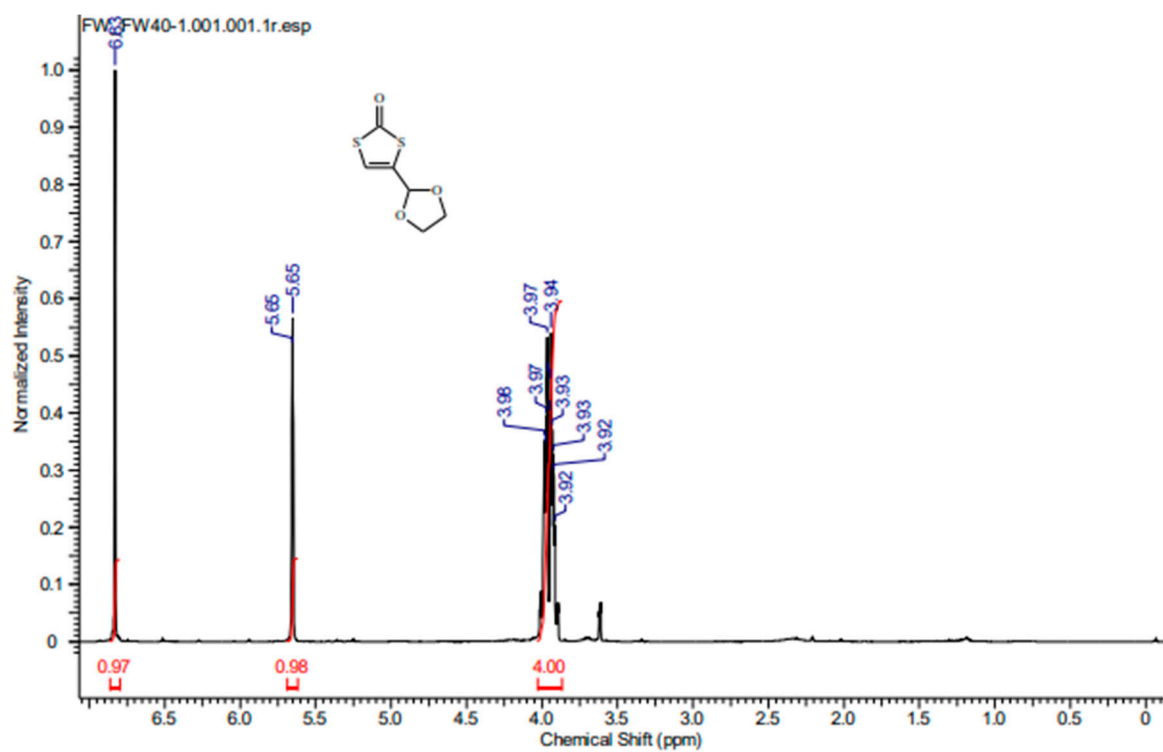

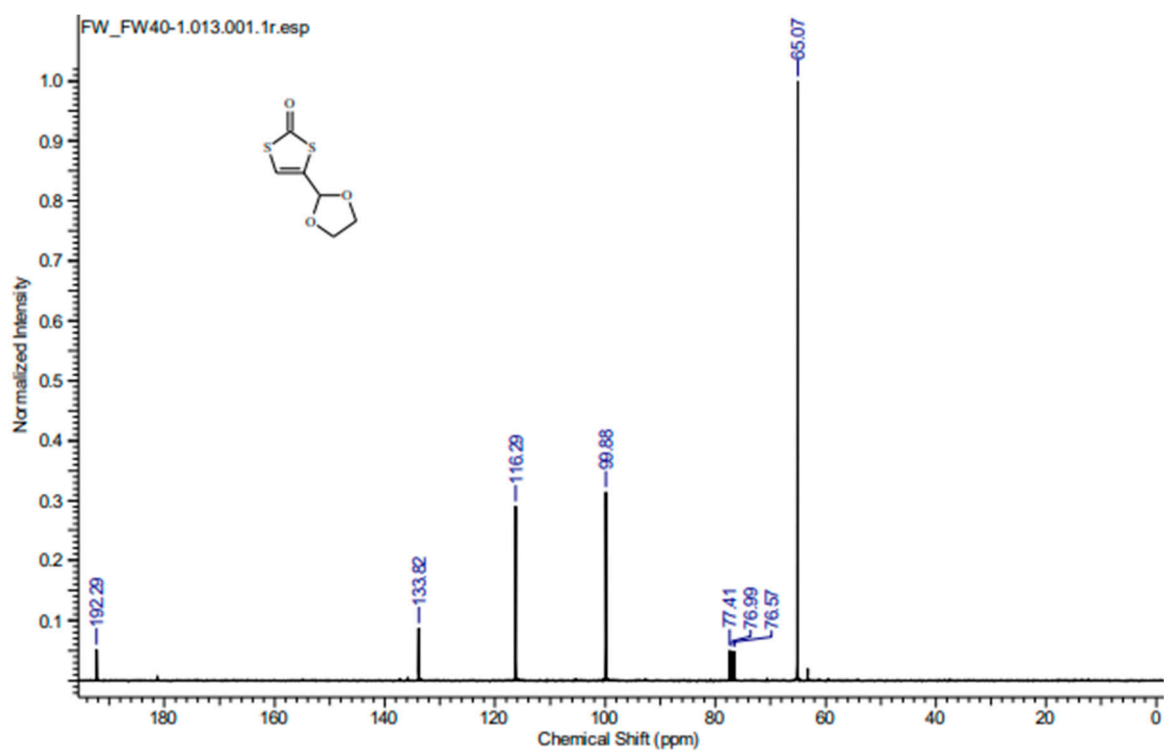

Figure S2:  $^{13}\text{C}$  spectrum of compound 14.

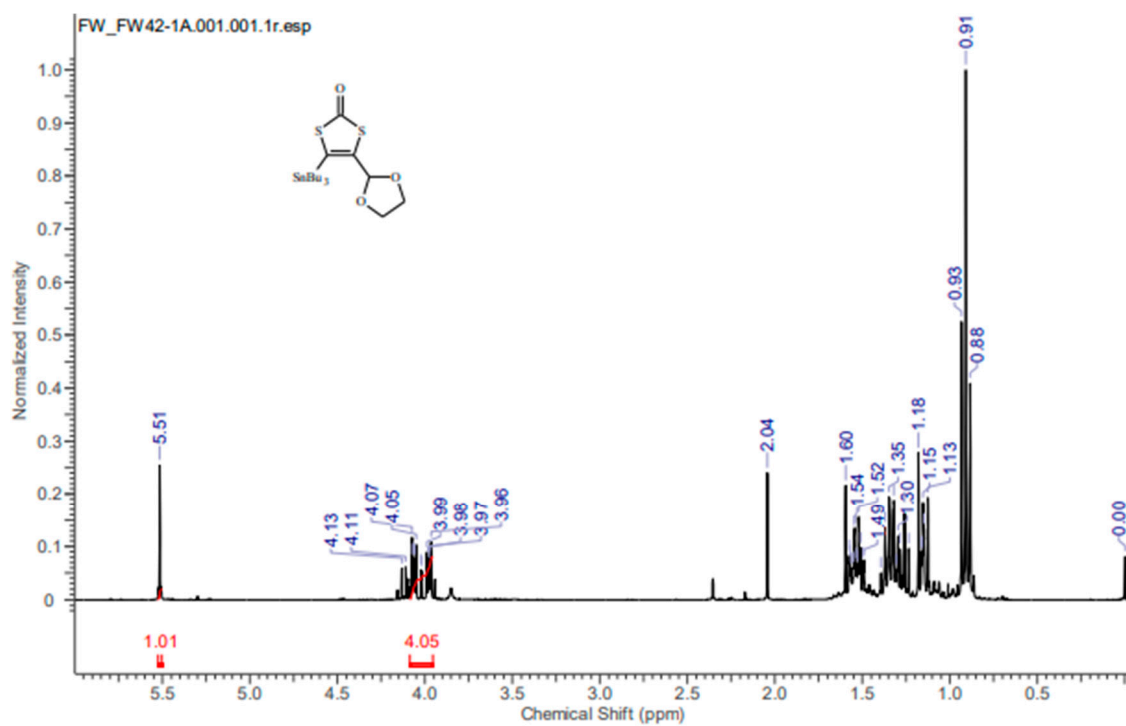

Figure S3:  $^1\text{H}$  spectrum of compound 15.

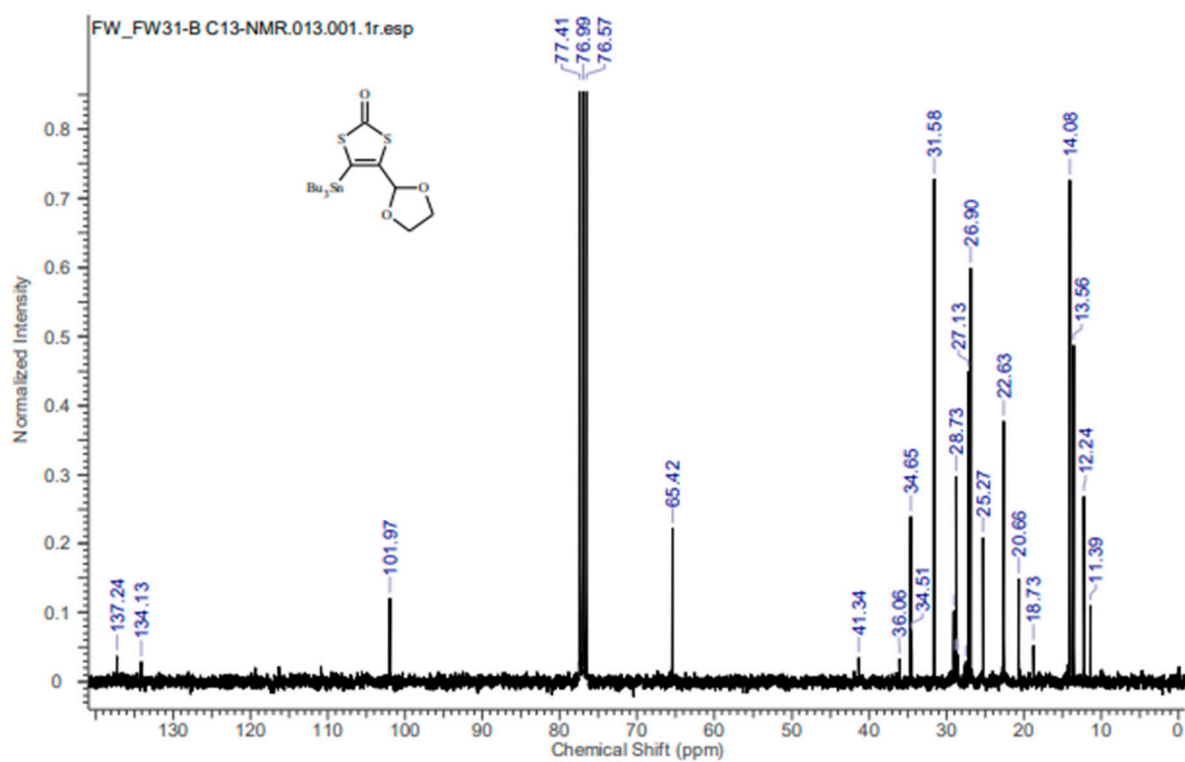

Figure S4:  $^{13}\text{C}$  spectrum of compound 15.

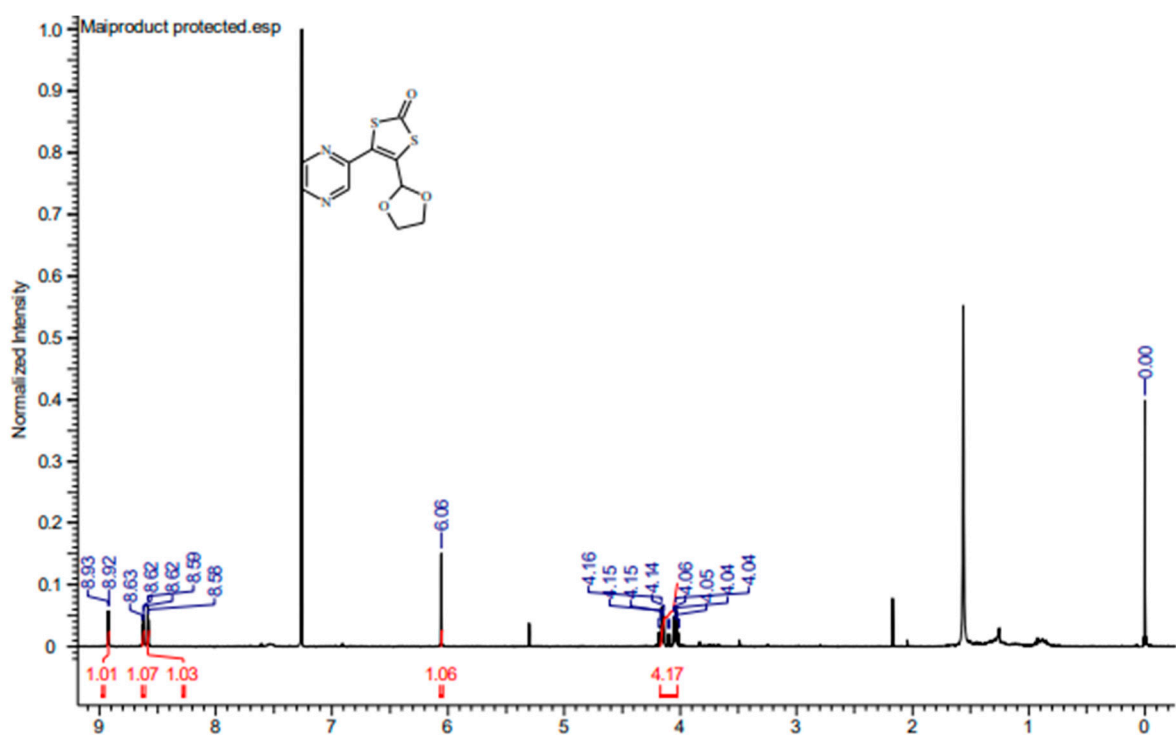

Figure S5:  $^1\text{H}$  spectrum of compound 16.

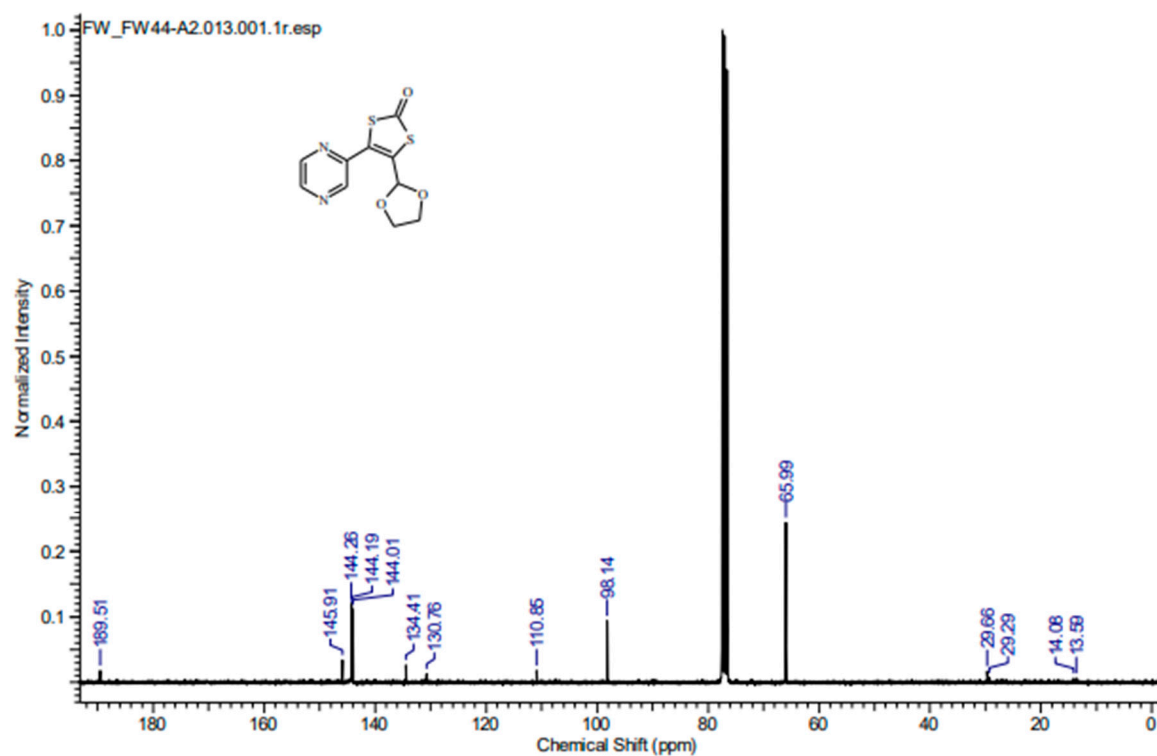

Figure S6:  $^{13}\text{C}$  spectrum of compound 16.

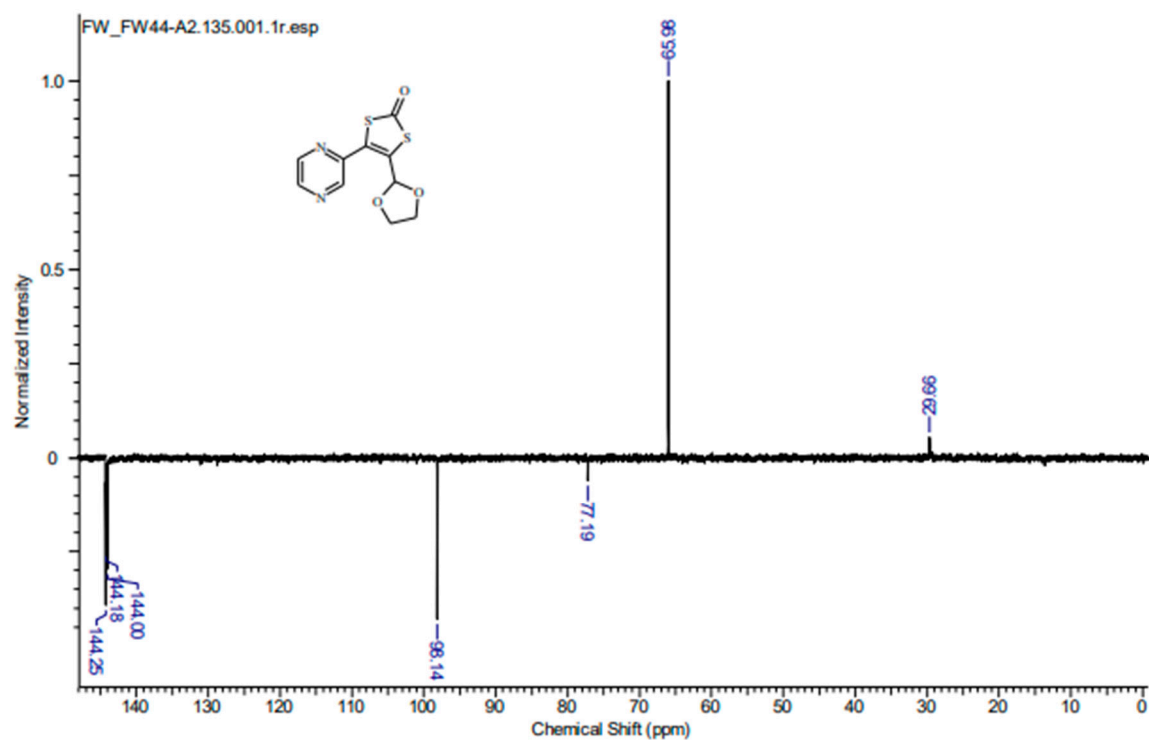

Figure S7:

### X-Ray Single crystal diffraction data

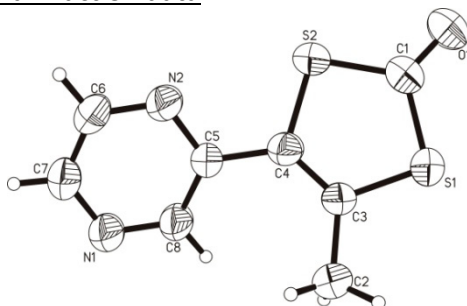

Figure S10: Molecular structure of 12

**Table S1: Crystal Data and Structure Refinement for 12.**

| 12                                              |                                                                  |
|-------------------------------------------------|------------------------------------------------------------------|
| empirical formula                               | C <sub>8</sub> H <sub>6</sub> N <sub>2</sub> OS <sub>2</sub>     |
| M (g/mol)                                       | 210.27                                                           |
| crystal system                                  | monoclinic                                                       |
| space group                                     | <i>P</i> 2 <sub>1</sub> / <i>c</i>                               |
| <i>a</i> (Å)                                    | 3.8549(7)                                                        |
| <i>b</i> (Å)                                    | 14.330(3)                                                        |
| <i>c</i> (Å)                                    | 15.849(3)                                                        |
| <i>V</i> (Å <sup>3</sup> )                      | 874.1(3)                                                         |
| <i>Z</i>                                        | 4                                                                |
| <i>D</i> (calcd) (g/cm <sup>3</sup> )           | 1.598                                                            |
| abs coeff (mm <sup>-1</sup> )                   | 0.564                                                            |
| reflections collected/unique                    | 7157 / 1838 [ <i>R</i> (int) = 0.0812]                           |
| final <i>R</i> [ <i>I</i> > 2σ( <i>I</i> )]     | <i>R</i> <sub>1</sub> = 0.0563, w <i>R</i> <sup>2</sup> = 0.1568 |
| <i>R</i> indices (all data)                     | <i>R</i> <sub>1</sub> = 0.1109, w <i>R</i> <sup>2</sup> = 0.1765 |
| data / restraints / parameters                  | 1838 / 0 / 120                                                   |
| goodness of fit on <i>F</i> <sup>2</sup>        | 1.000                                                            |
| Largest diff. peak and hole (e/Å <sup>3</sup> ) | 0.425 and -0.338                                                 |

**Table S2: Bond lengths [Å] and angles [°] for 12.**

| Bond lengths |          | Angles           |          |
|--------------|----------|------------------|----------|
| S(1)-C(3)    | 1.734(5) | C(3)-S(1)-C(1)   | 97.1(2)  |
| S(1)-C(1)    | 1.766(5) | C(4)-S(2)-C(1)   | 96.7(2)  |
| S(2)-C(4)    | 1.751(4) | C(7)-N(1)-C(8)   | 115.1(4) |
| S(2)-C(1)    | 1.757(5) | C(6)-N(2)-C(5)   | 116.4(4) |
| O(1)-C(1)    | 1.209(6) | O(1)-C(1)-S(2)   | 123.7(4) |
| N(1)-C(7)    | 1.335(6) | O(1)-C(1)-S(1)   | 124.1(4) |
| N(1)-C(8)    | 1.336(6) | S(2)-C(1)-S(1)   | 112.2(3) |
| N(2)-C(6)    | 1.319(6) | C(3)-C(2)-H(2A)  | 109.5    |
| N(2)-C(5)    | 1.343(5) | C(3)-C(2)-H(2B)  | 109.5    |
| C(2)-C(3)    | 1.508(6) | H(2A)-C(2)-H(2B) | 109.5    |
| C(2)-H(2A)   | 0.9600   | C(3)-C(2)-H(2C)  | 109.5    |
| C(2)-H(2B)   | 0.9600   | H(2A)-C(2)-H(2C) | 109.5    |
| C(2)-H(2C)   | 0.9600   | H(2B)-C(2)-H(2C) | 109.5    |
| C(3)-C(4)    | 1.345(6) | C(4)-C(3)-C(2)   | 128.1(4) |
| C(4)-C(5)    | 1.470(6) | C(4)-C(3)-S(1)   | 116.9(3) |
| C(5)-C(8)    | 1.377(6) | C(2)-C(3)-S(1)   | 114.9(3) |
| C(6)-C(7)    | 1.366(7) | C(3)-C(4)-C(5)   | 128.5(4) |
| C(6)-H(6)    | 0.9300   | C(3)-C(4)-S(2)   | 117.0(3) |
| C(7)-H(7)    | 0.9300   | C(5)-C(4)-S(2)   | 114.5(3) |
| C(8)-H(8)    | 0.9300   | N(2)-C(5)-C(8)   | 120.2(4) |
|              |          | N(2)-C(5)-C(4)   | 116.5(4) |
|              |          | C(8)-C(5)-C(4)   | 123.2(4) |
|              |          | N(2)-C(6)-C(7)   | 123.0(4) |
|              |          | N(2)-C(6)-H(6)   | 118.5    |
|              |          | C(7)-C(6)-H(6)   | 118.5    |
|              |          | N(1)-C(7)-C(6)   | 121.8(4) |
|              |          | N(1)-C(7)-H(7)   | 119.1    |
|              |          | C(6)-C(7)-H(7)   | 119.1    |
|              |          | N(1)-C(8)-C(5)   | 123.3(4) |
|              |          | N(1)-C(8)-H(8)   | 118.3    |
|              |          | C(5)-C(8)-H(8)   | 118.3    |

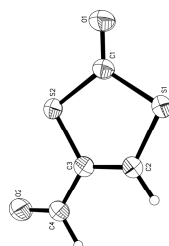

Figure S11: Molecular structure of 13

**Table S3: Crystal Data and Structure Refinement for 13.**

| 13                                              |                                                                 |
|-------------------------------------------------|-----------------------------------------------------------------|
| empirical formula                               | C <sub>4</sub> H <sub>2</sub> O <sub>2</sub> S <sub>2</sub>     |
| M (g/mol)                                       | 146.18                                                          |
| crystal system                                  | orthorhombic                                                    |
| space group                                     | <i>Fdd2</i>                                                     |
| <i>a</i> (Å)                                    | 22.215(4)                                                       |
| <i>b</i> (Å)                                    | 26.550(5)                                                       |
| <i>c</i> (Å)                                    | 3.8162(8)                                                       |
| <i>V</i> (Å <sup>3</sup> )                      | 2250.8(8)                                                       |
| <i>Z</i>                                        | 16                                                              |
| <i>D</i> (calcd) (g/cm <sup>3</sup> )           | 1.725                                                           |
| abs coeff (mm <sup>-1</sup> )                   | 0.836                                                           |
| reflections collected/unique                    | 5648 / 1416 [ <i>R</i> (int) = 0.1381]                          |
| final <i>R</i> [ <i>I</i> > 2σ( <i>I</i> )]     | <i>R</i> <sub>1</sub> = 0.0435, <i>wR</i> <sup>2</sup> = 0.0981 |
| <i>R</i> indices (all data)                     | <i>R</i> <sub>1</sub> = 0.0627, <i>wR</i> <sup>2</sup> = 0.1268 |
| data / restraints / parameters                  | 1416 / 1 / 82                                                   |
| goodness of fit on <i>F</i> <sup>2</sup>        | 1.099                                                           |
| Largest diff. peak and hole (e/Å <sup>3</sup> ) | 0.417 and -0.796                                                |

**Table S4: Bond lengths [Å] and angles [°] for 13.**

| Bond lengths |          |                | Angles   |
|--------------|----------|----------------|----------|
| C(1)-O(1)    | 1.197(8) | O(1)-C(1)-S(2) | 124.4(6) |
| C(1)-S(2)    | 1.766(6) | O(1)-C(1)-S(1) | 122.8(5) |
| C(1)-S(1)    | 1.783(7) | S(2)-C(1)-S(1) | 112.8(4) |
| C(2)-C(3)    | 1.334(9) | C(3)-C(2)-S(1) | 118.1(5) |
| C(2)-S(1)    | 1.714(6) | C(2)-C(3)-C(4) | 122.7(6) |
| C(3)-C(4)    | 1.458(9) | C(2)-C(3)-S(2) | 117.9(5) |
| C(3)-S(2)    | 1.737(6) | C(4)-C(3)-S(2) | 119.4(5) |
| C(4)-O(2)    | 1.204(8) | O(2)-C(4)-C(3) | 123.8(6) |
|              |          | C(2)-S(1)-C(1) | 95.7(3)  |
|              |          | C(3)-S(2)-C(1) | 95.4(3)  |



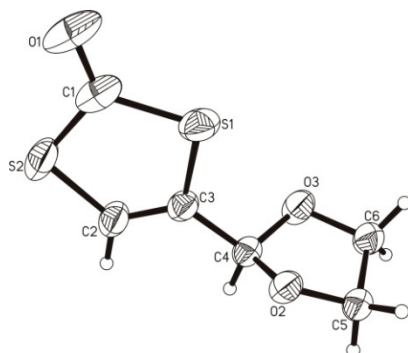

Figure S12: Molecular structure of 14

Table S5: Crystal Data and Structure Refinement for 14.

| 14                                              |                                                                 |
|-------------------------------------------------|-----------------------------------------------------------------|
| empirical formula                               | C <sub>6</sub> H <sub>6</sub> O <sub>3</sub> S <sub>2</sub>     |
| M (g/mol)                                       | 190.23                                                          |
| crystal system                                  | monoclinic                                                      |
| space group                                     | <i>Cc</i>                                                       |
| <i>a</i> (Å)                                    | 18.353(4)                                                       |
| <i>b</i> (Å)                                    | 4.9592(10)                                                      |
| <i>c</i> (Å)                                    | 9.3924(19)                                                      |
| <i>V</i> (Å <sup>3</sup> )                      | 785.3(3)                                                        |
| <i>Z</i>                                        | 4                                                               |
| <i>D</i> (calcd) (g/cm <sup>3</sup> )           | 1.609                                                           |
| abs coeff (mm <sup>-1</sup> )                   | 0.629                                                           |
| reflections collected/unique                    | 4039 / 1913 [ <i>R</i> (int) = 0.0328]                          |
| final <i>R</i> [ <i>I</i> > 2σ( <i>I</i> )]     | <i>R</i> <sub>1</sub> = 0.0326, <i>wR</i> <sup>2</sup> = 0.0883 |
| <i>R</i> indices (all data)                     | <i>R</i> <sub>1</sub> = 0.0357, <i>wR</i> <sup>2</sup> = 0.0906 |
| data / restraints / parameters                  | 1913 / 2 / 104                                                  |
| goodness of fit on <i>F</i> <sup>2</sup>        | 1.082                                                           |
| Largest diff. peak and hole (e/Å <sup>3</sup> ) | 0.282 and -0.305                                                |

**Table S6: Bond lengths [Å] and angles [°] for 14.**

| Bond lengths |          | Angles           |            |
|--------------|----------|------------------|------------|
| S(1)-C(3)    | 1.737(3) | C(3)-S(1)-C(1)   | 96.06(16)  |
| S(1)-C(1)    | 1.773(4) | C(2)-S(2)-C(1)   | 96.22(17)  |
| S(2)-C(2)    | 1.725(4) | C(4)-O(2)-C(5)   | 103.6(2)   |
| S(2)-C(1)    | 1.773(4) | C(4)-O(3)-C(6)   | 107.0(2)   |
| O(1)-C(1)    | 1.200(5) | O(1)-C(1)-S(1)   | 124.3(4)   |
| O(2)-C(4)    | 1.398(3) | O(1)-C(1)-S(2)   | 123.6(4)   |
| O(2)-C(5)    | 1.433(4) | S(1)-C(1)-S(2)   | 112.12(19) |
| O(3)-C(4)    | 1.411(4) | C(3)-C(2)-S(2)   | 118.1(3)   |
| O(3)-C(6)    | 1.432(4) | C(3)-C(2)-H(2)   | 117(3)     |
| C(2)-C(3)    | 1.327(5) | S(2)-C(2)-H(2)   | 124(3)     |
| C(2)-H(2)    | 1.01(5)  | C(2)-C(3)-C(4)   | 124.1(3)   |
| C(3)-C(4)    | 1.487(4) | C(2)-C(3)-S(1)   | 117.5(3)   |
| C(4)-H(4)    | 1.0000   | C(4)-C(3)-S(1)   | 118.4(2)   |
| C(5)-C(6)    | 1.507(4) | O(2)-C(4)-O(3)   | 105.5(2)   |
| C(5)-H(5A)   | 0.9900   | O(2)-C(4)-C(3)   | 110.8(2)   |
| C(5)-H(5B)   | 0.9900   | O(3)-C(4)-C(3)   | 110.3(2)   |
| C(6)-H(6A)   | 0.9900   | O(2)-C(4)-H(4)   | 110.1      |
| C(6)-H(6B)   | 0.9900   | O(3)-C(4)-H(4)   | 110.1      |
|              |          | C(3)-C(4)-H(4)   | 110.1      |
|              |          | O(2)-C(5)-C(6)   | 102.9(2)   |
|              |          | O(2)-C(5)-H(5A)  | 111.2      |
|              |          | C(6)-C(5)-H(5A)  | 111.2      |
|              |          | O(2)-C(5)-H(5B)  | 111.2      |
|              |          | C(6)-C(5)-H(5B)  | 111.2      |
|              |          | H(5A)-C(5)-H(5B) | 109.1      |
|              |          | O(3)-C(6)-C(5)   | 104.5(2)   |
|              |          | O(3)-C(6)-H(6A)  | 110.9      |
|              |          | C(5)-C(6)-H(6A)  | 110.9      |
|              |          | O(3)-C(6)-H(6B)  | 110.9      |
|              |          | C(5)-C(6)-H(6B)  | 110.9      |
|              |          | H(6A)-C(6)-H(6B) | 108.9      |

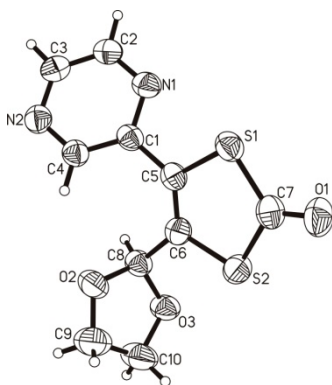

Figure S13: Molecular structure of 16

Table S7: Crystal Data and Structure Refinement for 16.

| 16                                              |                                                                             |
|-------------------------------------------------|-----------------------------------------------------------------------------|
| empirical formula                               | C <sub>10</sub> H <sub>8</sub> N <sub>2</sub> O <sub>3</sub> S <sub>2</sub> |
| M (g/mol)                                       | 268.30                                                                      |
| crystal system                                  | orthorhombic                                                                |
| space group                                     | <i>Pbca</i>                                                                 |
| <i>a</i> (Å)                                    | 14.614(3)                                                                   |
| <i>b</i> (Å)                                    | 8.1344(16)                                                                  |
| <i>c</i> (Å)                                    | 18.224(4)                                                                   |
| <i>V</i> (Å <sup>3</sup> )                      | 2166.4(8)                                                                   |
| <i>Z</i>                                        | 8                                                                           |
| <i>D</i> (calcd) (g/cm <sup>3</sup> )           | 1.645                                                                       |
| abs coeff (mm <sup>-1</sup> )                   | 0.488                                                                       |
| reflections collected/unique                    | 22164 / 2818 [ <i>R</i> (int) = 0.1175]                                     |
| final <i>R</i> [ <i>I</i> > 2σ( <i>I</i> )]     | <i>R</i> <sub>1</sub> = 0.0582, w <i>R</i> <sup>2</sup> = 0.1365            |
| <i>R</i> indices (all data)                     | <i>R</i> <sub>1</sub> = 0.1022, w <i>R</i> <sup>2</sup> = 0.1652            |
| data / restraints / parameters                  | 2818 / 0 / 154                                                              |
| goodness of fit on <i>F</i> <sup>2</sup>        | 0.845                                                                       |
| Largest diff. peak and hole (e/Å <sup>3</sup> ) | 0.397 and -0.364                                                            |

**Table S8: Bond lengths [Å] and angles [°] for 16.**

| Bond lengths |          | Angles          |           |
|--------------|----------|-----------------|-----------|
| S(1)-C(5)    | 1.755(3) | C(5)-S(1)-C(7)  | 96.28(17) |
| S(1)-C(7)    | 1.761(4) | C(6)-S(2)-C(7)  | 96.17(17) |
| S(2)-C(6)    | 1.735(4) | C(9)-O(2)-C(8)  | 108.5(3)  |
| S(2)-C(7)    | 1.762(4) | C(8)-O(3)-C(10) | 108.3(3)  |
| O(1)-C(7)    | 1.210(4) | C(2)-N(1)-C(1)  | 115.8(3)  |
| O(2)-C(8)    | 1.417(4) | C(3)-N(2)-C(4)  | 115.8(3)  |
| O(3)-C(8)    | 1.412(4) | N(1)-C(1)-C(4)  | 121.0(3)  |
| O(3)-C(10)   | 1.411(5) | N(1)-C(1)-C(5)  | 116.2(3)  |
| N(1)-C(2)    | 1.335(5) | C(4)-C(1)-C(5)  | 122.9(3)  |
| N(1)-C(1)    | 1.347(4) | N(1)-C(2)-C(3)  | 122.7(3)  |
| N(2)-C(3)    | 1.334(5) | N(2)-C(3)-C(2)  | 121.8(3)  |
| N(2)-C(4)    | 1.333(5) | N(2)-C(4)-C(1)  | 122.9(3)  |
| C(1)-C(5)    | 1.466(5) | C(6)-C(5)-C(1)  | 127.8(3)  |
| C(2)-C(3)    | 1.378(5) | C(6)-C(5)-S(1)  | 116.4(3)  |
| C(5)-C(6)    | 1.339(5) | C(1)-C(5)-S(1)  | 115.8(2)  |
| C(6)-C(8)    | 1.514(5) | C(5)-C(6)-S(2)  | 118.1(3)  |
| C(9)-C(10)   | 1.437(6) | C(8)-C(6)-S(2)  | 115.3(2)  |
|              |          | O(1)-C(7)-S(1)  | 124.0(3)  |
|              |          | O(1)-C(7)-S(2)  | 123.1(3)  |
|              |          | S(1)-C(7)-S(2)  | 113.0(2)  |
|              |          | O(2)-C(8)-O(3)  | 107.7(3)  |
|              |          | O(2)-C(8)-C(6)  | 109.1(3)  |
|              |          | O(3)-C(8)-C(6)  | 110.3(3)  |
|              |          | O(2)-C(9)-C(10) | 108.9(4)  |
|              |          | O(3)-C(10)-C(9) | 106.5(3)  |
